# Supplementary material for: Morphology Regulation of Zeolite MWW via Classical/Nonclassical Crystallization Pathways
Source: MDPI journal article supplement (doi:10.3390/molecules29010170), 2023-12-27
Supplement: s1 [file s1]

# Morphology Regulation of Zeolite MWW via Classical/Nonclassical Crystallization Pathways

Wenwen Zi <sup>1,\*</sup>, Zejing Hu <sup>1</sup>, Xiangyu Jiang <sup>1</sup>, Junjun Zhang <sup>2</sup>, Chengzhi Guo <sup>1</sup>, Konggang Qu <sup>1</sup>, Shuo Tao <sup>1</sup>, Dengran Tan <sup>1</sup> and Fangling Liu <sup>1</sup>

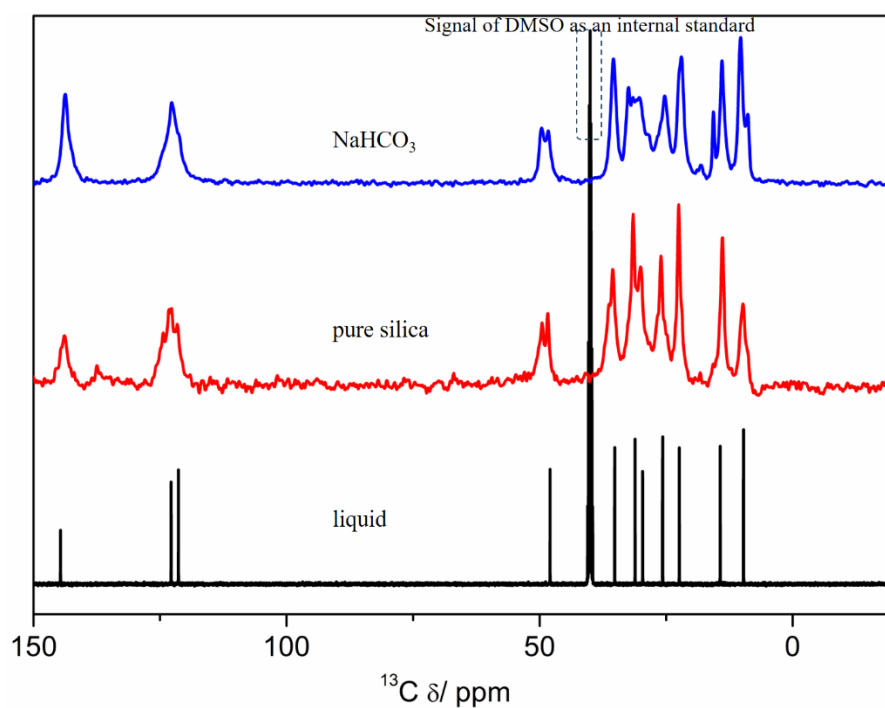

**Figure S1.** Comparison of  $^{13}\text{C}$  NMR spectra of the synthesized sample and the liquid NMR in  $\text{D}_2\text{O}$ .

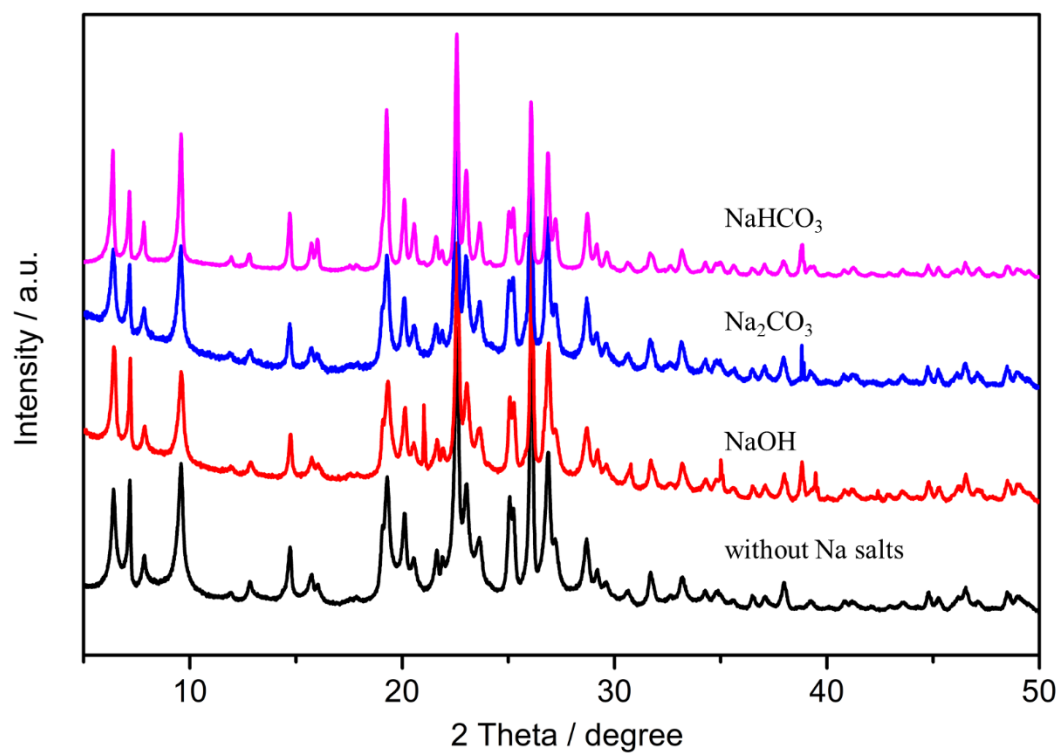

**Figure S2.** PXRD patterns of the samples with  $\text{NaOH}$ ,  $\text{Na}_2\text{CO}_3$ ,  $\text{NaHCO}_3$ .

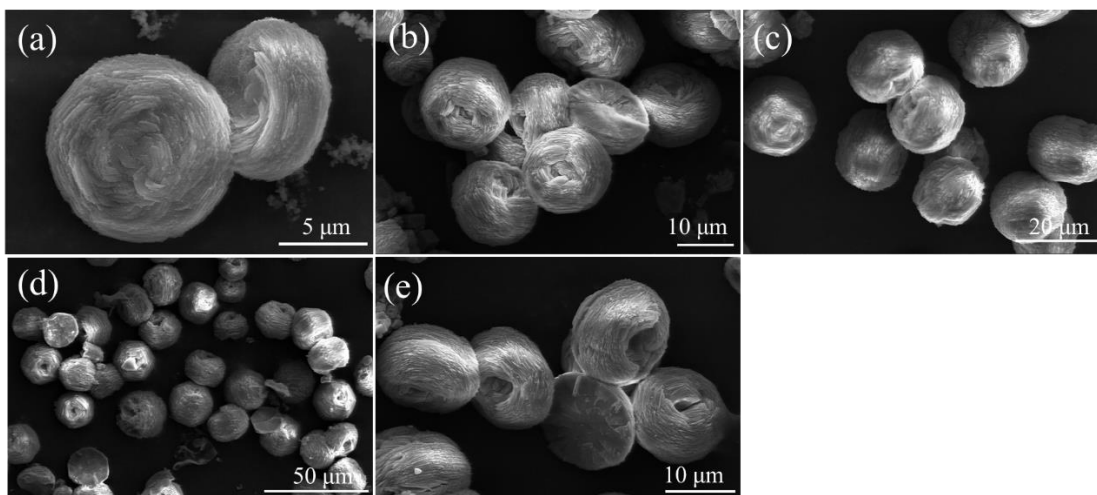

**Figure S3.** SEM images of the samples with different ratio of NaOH/Si (a: 0.05, b: 0.1, c: 0.15, d: 0.2, e: 0.25).

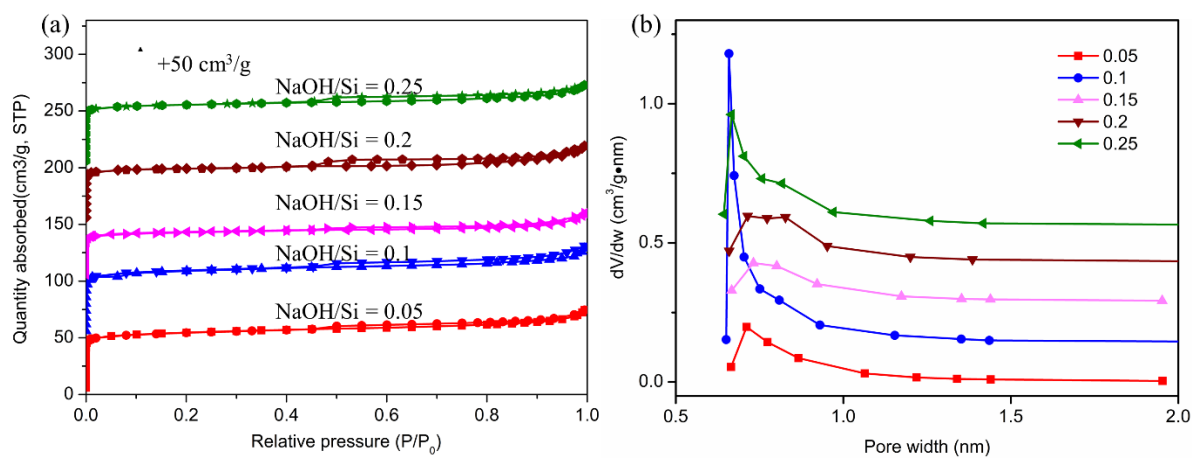

**Figure S4.** N<sub>2</sub> adsorption/desorption isotherms and pore size distribution of NaOH/Si.

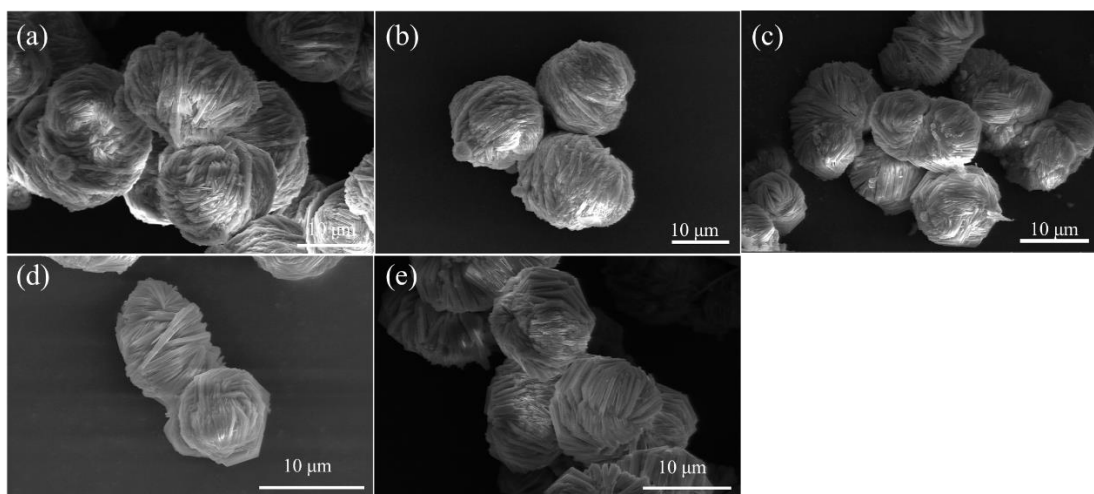

**Figure S5.** SEM images of the samples with different ratio of  $\text{Na}_2\text{CO}_3/\text{Si}$  (a: 0.05, b: 0.25, c: 0.1, d: 0.15, e: 0.2).

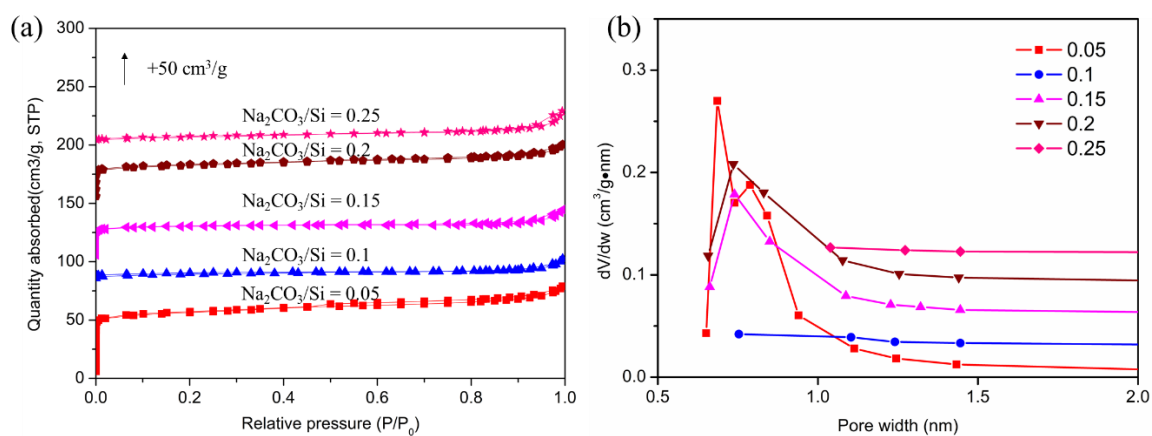

**Figure S6.**  $\text{N}_2$  adsorption/desorption isotherms and pore size distribution of  $\text{Na}_2\text{CO}_3/\text{Si}$ .

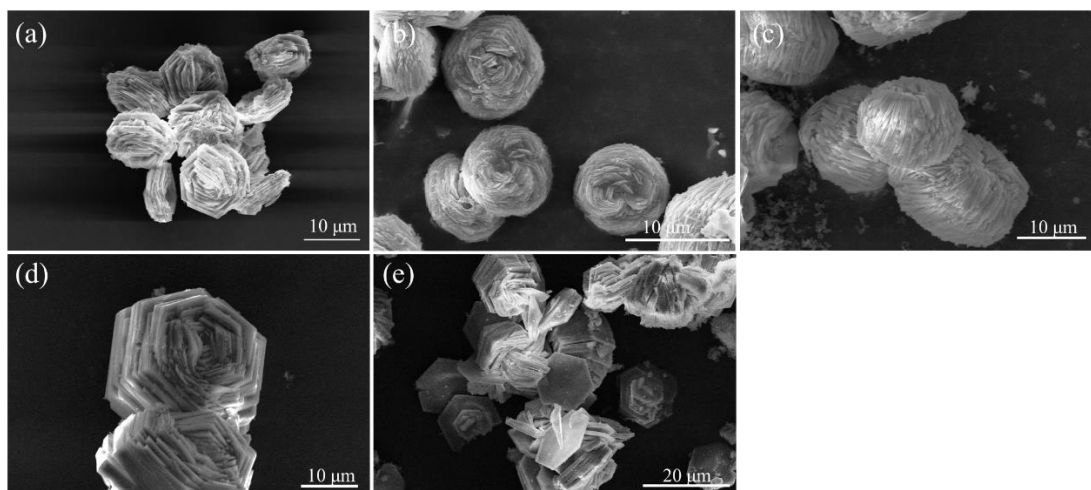

**Figure S7.** SEM images of the samples with the addition of  $\text{NaHCO}_3$  under different ratio of

$\text{HF/Si}$  (a: 0.5, b: 0.65, c: 0.75, d: 1, e: 1.25).

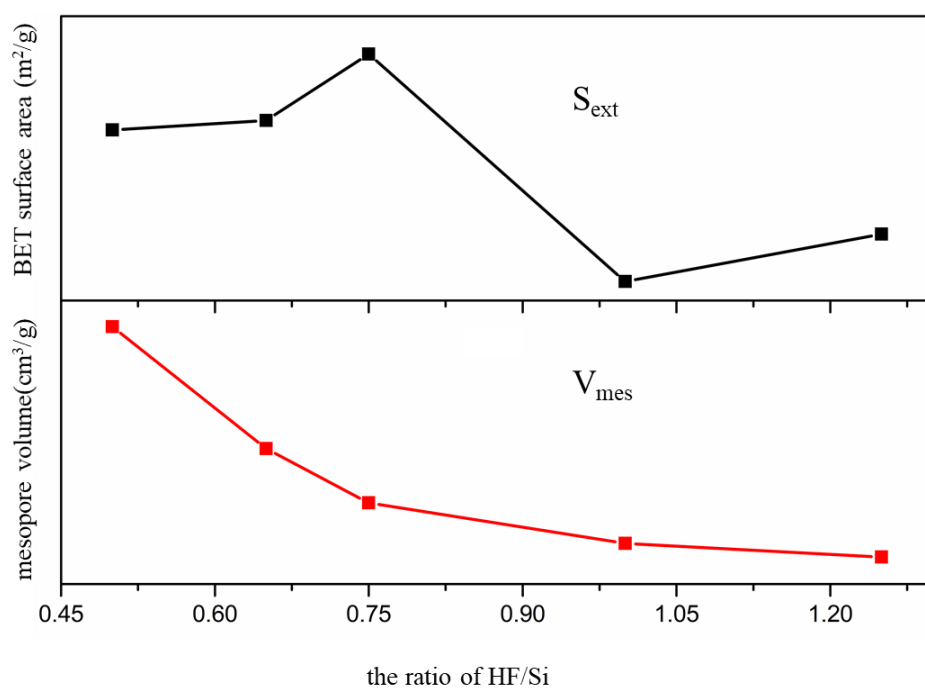

**Figure S8.** The effect of HF on the  $S_{\text{ext}}$  and  $V_{\text{mes}}$  in the  $\text{NaHCO}_3$ -MWW samples.

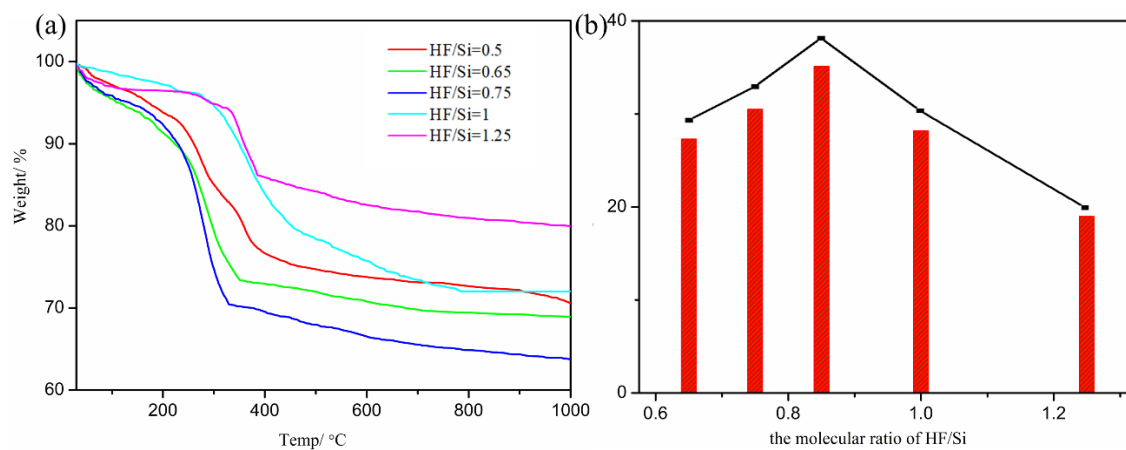

**Figure S9.** (a) TG analysis of the samples with the addition of  $\text{NaHCO}_3$  under different ratio of

HF/Si (a: 0.5, b: 0.65, c: 0.75, d: 1, e: 1.25) and (b) the mass loss comparison.

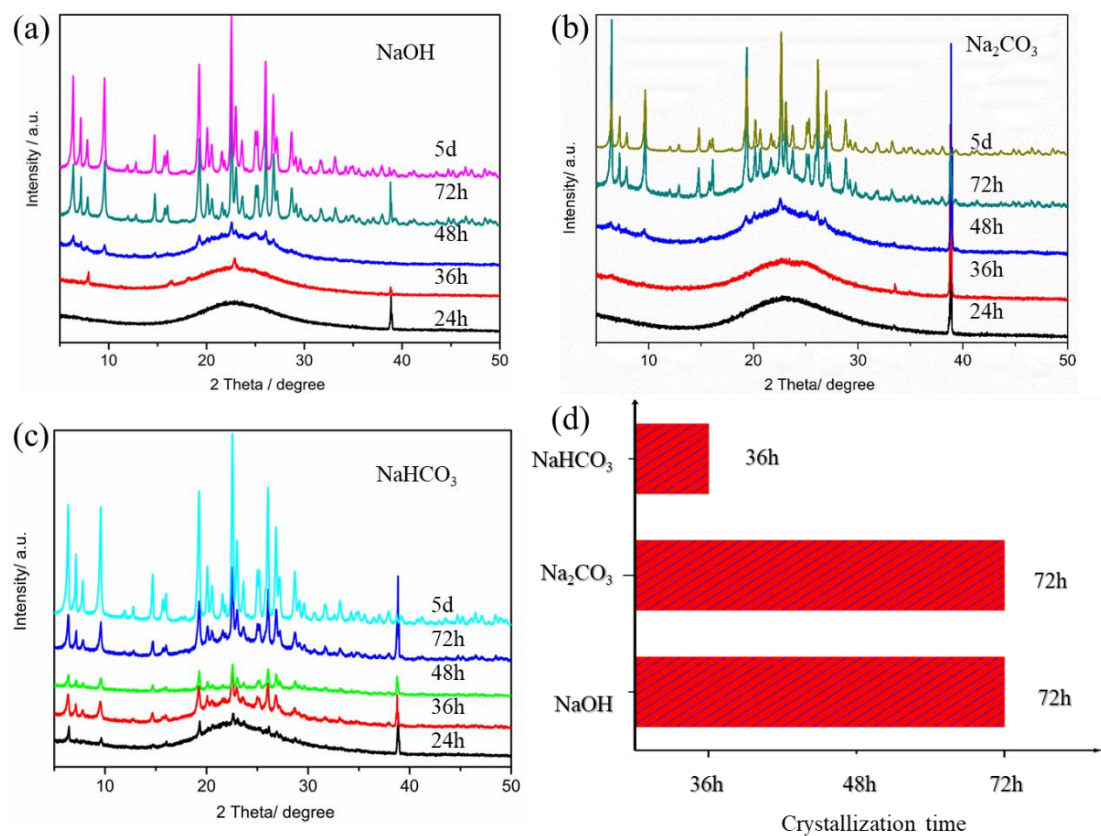

**Figure S10.** PXRD patterns of samples with different kinds of Na salts subjected to the crystallization time and the comparison of the nucleation time.

**Table S1.** EDS data for the samples with the addition of different ratio of NaOH/Si.

| Run | NaOH/Si | Si(wt%) | O(wt%) | C(wt%) | N(wt%) | F(wt%) | Na(wt%) |
|-----|---------|---------|--------|--------|--------|--------|---------|
| 1   | 0.05    | 50.17   | 30.46  | 16.32  | 2.02   | 0.67   | 0.36    |
| 2   | 0.1     | 39.21   | 40.95  | 15.21  | 3.02   | 1.31   | 0.30    |
| 3   | 0.15    | 49.84   | 30.15  | 19.66  | 1.33   | 0      | 0.02    |
| 4   | 0.2     | 48.90   | 34.74  | 13.71  | 2.36   | 0.29   | 0       |
| 5   | 0.25    | 41.00   | 41.77  | 13.81  | 2.72   | 0.62   | 0.08    |

**Table S2.** EDS data for the samples with the addition of different ratio of Na<sub>2</sub>CO<sub>3</sub>/Si.

| Run | Na <sub>2</sub> CO <sub>3</sub> /Si | Si(wt%) | O(wt%) | C(wt%) | N(wt%) | F(wt%) | Na(wt%) |
|-----|-------------------------------------|---------|--------|--------|--------|--------|---------|
| 1   | 0.05                                | 40.71   | 41.00  | 14.40  | 2.98   | 0.84   | 0.08    |
| 2   | 0.1                                 | 51.66   | 33.51  | 13.60  | 1.11   | 0      | 0.11    |
| 3   | 0.15                                | 46.86   | 36.88  | 13.55  | 2.37   | 0.22   | 0.13    |
| 4   | 0.2                                 | 46.65   | 36.40  | 14.34  | 2.36   | 0.25   | 0       |
| 5   | 0.25                                | 47.07   | 35.35  | 14.79  | 2.44   | 0.31   | 0.05    |

**Table S3.** EDS data for the samples with the addition of NaHCO<sub>3</sub> under different ratio of HF/Si.

| Run | HF/Si | Si(wt%) | O(wt%) | C(wt%) | N(wt%) | F(wt%) | Na(wt%) |
|-----|-------|---------|--------|--------|--------|--------|---------|
| 1   | 0.5   | 58.98   | 24.45  | 15.25  | 0.91   | 0.29   | 0.11    |
| 2   | 0.65  | 70.19   | 19.47  | 10.22  | 0      | 0.11   | 0.02    |
| 3   | 0.75  | 39.11   | 43.60  | 13.73  | 2.82   | 0.61   | 0.12    |
| 4   | 1     | 35.63   | 40.28  | 18.83  | 3.94   | 1.21   | 0.12    |
| 5   | 1.25  | 43.69   | 37.87  | 14.92  | 2.58   | 0.68   | 0.26    |
